# Supplementary material for: The Deubiquitinating Enzyme UBPY Is Required for Lysosomal Biogenesis and Productive Autophagy in Drosophila
Source: PubMed Central journal article supplement (PMC4646453; doi:10.1371/journal.pone.0143078), 2015-11-16

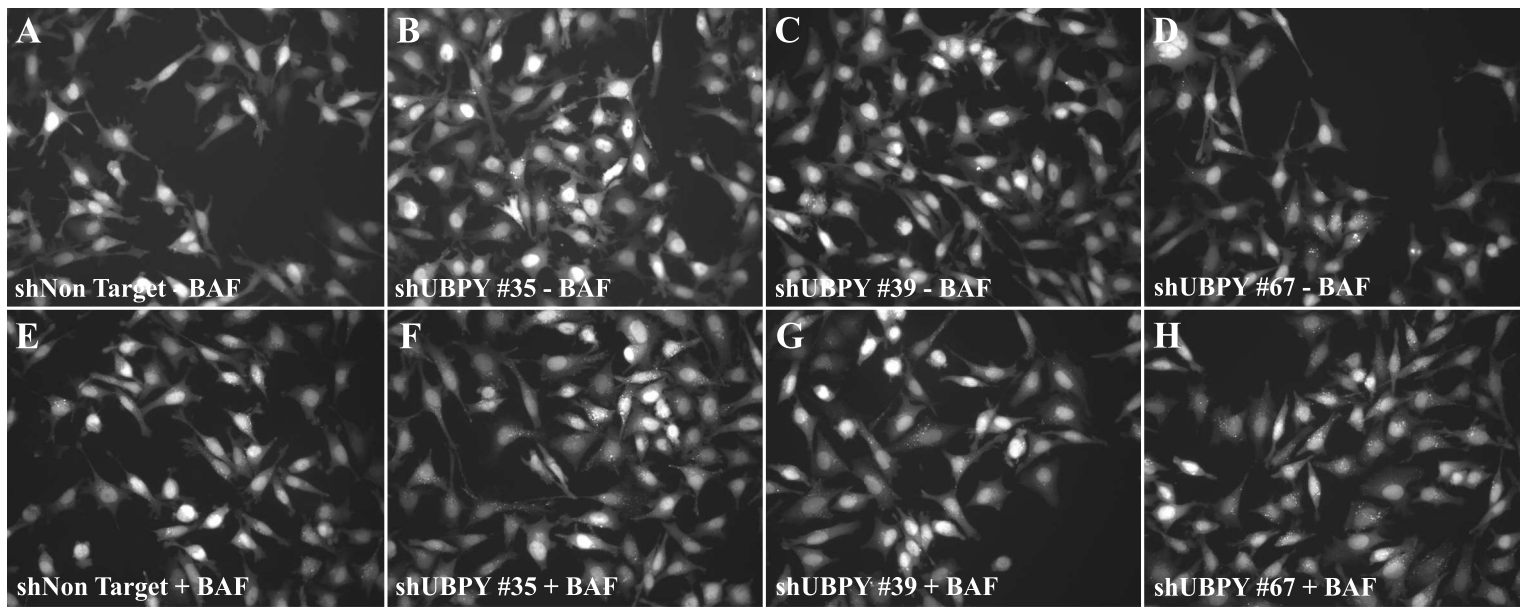

Supplement: pone.0143078.s004.pdf [file pone.0143078.s004.pdf]
