# Supplementary material for: The Deubiquitinating Enzyme UBPY Is Required for Lysosomal Biogenesis and Productive Autophagy in Drosophila
Source: PubMed Central journal article supplement (PMC4646453; doi:10.1371/journal.pone.0143078), 2015-11-16
Supplement: pone.0143078.s006.pdf [file pone.0143078.s006.pdf]

1. Phenotypes induced by DUBs silencing in the whole larval fat body.

|             | Gene Identifier | Symbol  | Closest Human DUB | VDRC ID | Strongest phenotype |             |                  |
|-------------|-----------------|---------|-------------------|---------|---------------------|-------------|------------------|
|             |                 |         |                   |         | Larval Death        | Pupal Death | Autophagic cells |
| <b>USPs</b> | CG15817         |         | USP1              | 41605   |                     |             | 2.85%            |
|             | CG14619         |         | USP2              |         |                     |             | 2.22%            |
|             | CG12082         |         | USP5              | 17567   |                     | ✓           | 3.085%           |
|             | CG1490          | USP7    | USP7              | 18281   |                     |             | 1.565%           |
|             | CG5798          | UBPY    | USP8              | 8931    |                     | ✓           | 53.705%          |
|             | CG1945          | faf     | USP9X             | 2955    |                     |             | 4.595%           |
|             | CG32479         |         | USP10             | 37858   | ✓                   |             |                  |
|             | CG7023          | USP12   | USP12             | 27799   |                     | ✓           | 69.56%           |
|             | CG5384          |         | USP14             | 27405   |                     |             | 1.945%           |
|             | CG8494          |         | USP20             | 28910   |                     |             | 1%               |
|             | CG4166          | Not     | USP22             | 45775   | ✓                   |             |                  |
|             | CG3016          |         | USP30             | 7090    |                     |             | 2.39%            |
|             | CG30421         |         | USP31             | 33726   |                     |             | 2.495%           |
|             | CG8334          |         | USP32             | 18981   |                     |             | 26.925%          |
|             | CG5794          |         | USP34             | 27517   |                     |             | 15.81%           |
|             | CG8830          |         | USP38             | 28960   | ✓                   |             |                  |
|             | CG7288          |         | USP39             | 47664   |                     |             | 8.145%           |
|             | CG4165          |         | USP45             | 41976   |                     |             | 85.585%          |
|             | CG5486          | Ubp64E  | USP47             | 26027   |                     |             | 4.49%            |
|             | CG2904          | ec      | USP54             | 26027   |                     |             | 0.96%            |
| CG5603      | CYLD            | CYLD    | 15340             |         |                     | 5.26%       |                  |
| <b>UCHs</b> | CG8445          | Calypso | BAP1              | 107757  |                     |             | 2.78%            |
|             | CG4265          | Uch     | UCHL3             | 26468   |                     |             | 0%               |
|             | CG3431          | Uch-L3  | UCHL5             | 34617   |                     |             | 65.655%          |
